# Supplementary material for: Repetitive DNA and Plant Domestication: Variation in Copy Number and Proximity to Genes of LTR-Retrotransposons among Wild and Cultivated Sunflower (Helianthus annuus) Genotypes
Source: PubMed Central journal article supplement — Genome Biol Evol. 2015 Nov 24;7(12):3368–82. doi: 10.1093/gbe/evv230 (PMC4700961; doi:10.1093/gbe/evv230), 2015-11-24
Supplement: supp_evv230_Mascagni_SupplMat_1.pdf [file supp_evv230_Mascagni_SupplMat_1.pdf]

## Supplementary material 1

Genotypes used in analyses of variability, identification code, area of cultivation (for cultivated genotypes) and number of reads sequenced by Illumina technique

| Type            | Name                          | Code | Id Code    | Area of cultivation | Raw reads  | Trimmed reads (paired ends) | Trimmed reads (single ends, 75 nt) |
|-----------------|-------------------------------|------|------------|---------------------|------------|-----------------------------|------------------------------------|
| Cultivars       | Hata                          | RA   | Ames 22503 | Argentina           | 32,100,390 | 31,624,960                  | 28,833,860                         |
|                 | Dussol                        | FRA  | Ames 22499 | France              | 25,678,406 | 25,375,912                  | 23,351,379                         |
|                 | Argentario                    | ITA  | Ames 1842  | Italy               | 10,759,866 | 10,566,652                  | 9,057,186                          |
|                 | Karlik                        | ESP  | Ames 3454  | Spain               | 23,499,752 | 23,087,458                  | 20,523,246                         |
|                 | Zelenka                       | RUS  | Ames 22530 | Russia              | 9,048,276  | 8,858,154                   | 7,867,148                          |
|                 | Roman "A"                     | ROM  | PI531386   | Romania             | 19,408,888 | 19,095,974                  | 16,785,648                         |
|                 | HOPI                          | USA1 | PI369359   | USA                 | 15,768,198 | 15,437,790                  | 13,390,344                         |
|                 | Seneca                        | USA2 | PI369360   | USA                 | 13,911,506 | 13,667,436                  | 12,034,208                         |
| Wild accessions | <i>H. annuus</i> Arizona      | AZ   | Ames14400  | -                   | 14,641,510 | 14,357,666                  | 12,569,563                         |
|                 | <i>H. annuus</i> Colorado     | CO   | PI586840   | -                   | 23,335,576 | 22,916,284                  | 19,693,252                         |
|                 | <i>H. annuus</i> Illinois     | IL   | PI 435540  | -                   | 18,577,580 | 18,145,470                  | 15,437,090                         |
|                 | <i>H. annuus</i> Kentucky     | KY   | PI 435613  | -                   | 14,853,802 | 14,580,828                  | 12,250,326                         |
|                 | <i>H. annuus</i> Mississippi  | MS   | PI 435608  | -                   | 22,921,544 | 22,226,864                  | 19,183,906                         |
|                 | <i>H. annuus</i> North Dakota | ND   | PI586811   | -                   | 51,681,332 | 49,574,892                  | 41,614,232                         |
|                 | <i>H. annuus</i> Washington   | WA   | PI 531018  | -                   | 6,996,658  | 6,724,410                   | 5,631,210                          |
