# Supplementary material for: Repetitive DNA and Plant Domestication: Variation in Copy Number and Proximity to Genes of LTR-Retrotransposons among Wild and Cultivated Sunflower (Helianthus annuus) Genotypes
Source: PubMed Central journal article supplement — Genome Biol Evol. 2015 Nov 24;7(12):3368–82. doi: 10.1093/gbe/evv230 (PMC4700961; doi:10.1093/gbe/evv230), 2015-11-24
Supplement: supp_evv230_Mascagni_SupplMat_2.pdf [file supp_evv230_Mascagni_SupplMat_2.pdf]

## Supplementary material 2

Analysis of redundancy and proximity to genes of the LTR-RT clusters present in the library, in six subsets of the North Dakota accession read package:

(a) Percent of reads mapping to different reference datasets, calculated in six read packages (of 6,000,000 75 nt-long reads each) of the North Dakota accession for each superfamily or family (only families with a genome proportion greater than 1% are reported)

| LTR-RTs superfamily or family | Subset 1 | Subset 2 | Subset 3 | Subset 4 | Subset 5 | Subset 6 | Max percentage variation |
|-------------------------------|----------|----------|----------|----------|----------|----------|--------------------------|
| All LTR-RTs                   | 46.51    | 46.50    | 46.50    | 46.52    | 46.45    | 46.49    | 0.14                     |
| <i>Copia</i>                  | 13.54    | 13.52    | 13.52    | 13.56    | 13.53    | 13.52    | 0.28                     |
| <i>AleII</i>                  | 5.00     | 4.99     | 4.99     | 5.01     | 4.99     | 4.99     | 0.43                     |
| <i>Maximus/SIRE</i>           | 6.17     | 6.17     | 6.17     | 6.19     | 6.17     | 6.16     | 0.44                     |
| <i>Gypsy</i>                  | 32.97    | 32.98    | 32.98    | 32.96    | 32.92    | 32.97    | 0.16                     |
| <i>Athila</i>                 | 2.96     | 2.97     | 2.97     | 2.96     | 2.96     | 2.96     | 0.42                     |
| <i>Chromovirus</i>            | 24.40    | 24.40    | 24.40    | 24.40    | 24.38    | 24.41    | 0.12                     |
| <i>Ogre/Tat</i>               | 5.61     | 5.61     | 5.61     | 5.61     | 5.58     | 5.60     | 0.50                     |

(b) Number of gene-RT mapping paired reads (i.e., paired reads of which one mapped onto a gene and the other onto a LTR-RT) per million of paired reads of which at least one mapped onto an LTR-RT, calculated among six subsets of reads (of 7,000,000 paired reads each) of the North Dakota accession on different families of LTR-RTs

| LTR-RTs superfamily or family | Subset 1 | Subset 2 | Subset 3 | Subset 4 | Subset 5 | Subset 6 | Max percentage variations |
|-------------------------------|----------|----------|----------|----------|----------|----------|---------------------------|
| All LTR-RTs                   | 143.86   | 149.43   | 151.29   | 146.57   | 146.57   | 143.57   | 5.10                      |
| <i>Copia</i>                  | 44.43    | 45.57    | 45.14    | 42.29    | 47.29    | 42.29    | 10.57                     |
| <i>AleI/Retrofit</i>          | 2.57     | 2.57     | 3.43     | 2.57     | 3.57     | 1.57     | 56.00                     |
| <i>AleII</i>                  | 12.71    | 14.29    | 16.14    | 13.29    | 14.71    | 11.29    | 30.09                     |
| <i>Angela</i>                 | 5.57     | 4.57     | 4.71     | 3.86     | 4.71     | 4.57     | 30.77                     |
| <i>Bianca</i>                 | 1.00     | 0.86     | 0.57     | 0.71     | 0.71     | 0.71     | 42.86                     |
| <i>Ivana/Oryco</i>            | 0.86     | 1.00     | 1.00     | 0.29     | 1.00     | 1.71     | 83.33                     |
| <i>Maximus/SIRE</i>           | 18.29    | 19.00    | 16.86    | 17.29    | 19.43    | 18.43    | 13.24                     |
| <i>TAR/Tork</i>               | 3.29     | 2.71     | 2.43     | 4.14     | 2.71     | 3.57     | 26.09                     |
| <i>Gypsy</i>                  | 99.43    | 103.86   | 106.14   | 104.29   | 99.29    | 101.29   | 6.46                      |
| <i>Athila</i>                 | 12.86    | 11.57    | 13.57    | 11.43    | 11.57    | 12.43    | 15.79                     |
| <i>Chromovirus</i>            | 74.00    | 78.71    | 77.86    | 78.43    | 73.86    | 76.86    | 6.17                      |
| <i>Ogre/Tat</i>               | 12.57    | 13.57    | 14.71    | 14.43    | 13.86    | 12.00    | 18.45                     |
