# Supplementary material for: Repetitive DNA and Plant Domestication: Variation in Copy Number and Proximity to Genes of LTR-Retrotransposons among Wild and Cultivated Sunflower (Helianthus annuus) Genotypes
Source: PubMed Central journal article supplement — Genome Biol Evol. 2015 Nov 24;7(12):3368–82. doi: 10.1093/gbe/evv230 (PMC4700961; doi:10.1093/gbe/evv230), 2015-11-24
Supplement: supp_evv230_Mascagni_SupplMat_3.pdf [file supp_evv230_Mascagni_SupplMat_3.pdf]

### Supplementary material 3

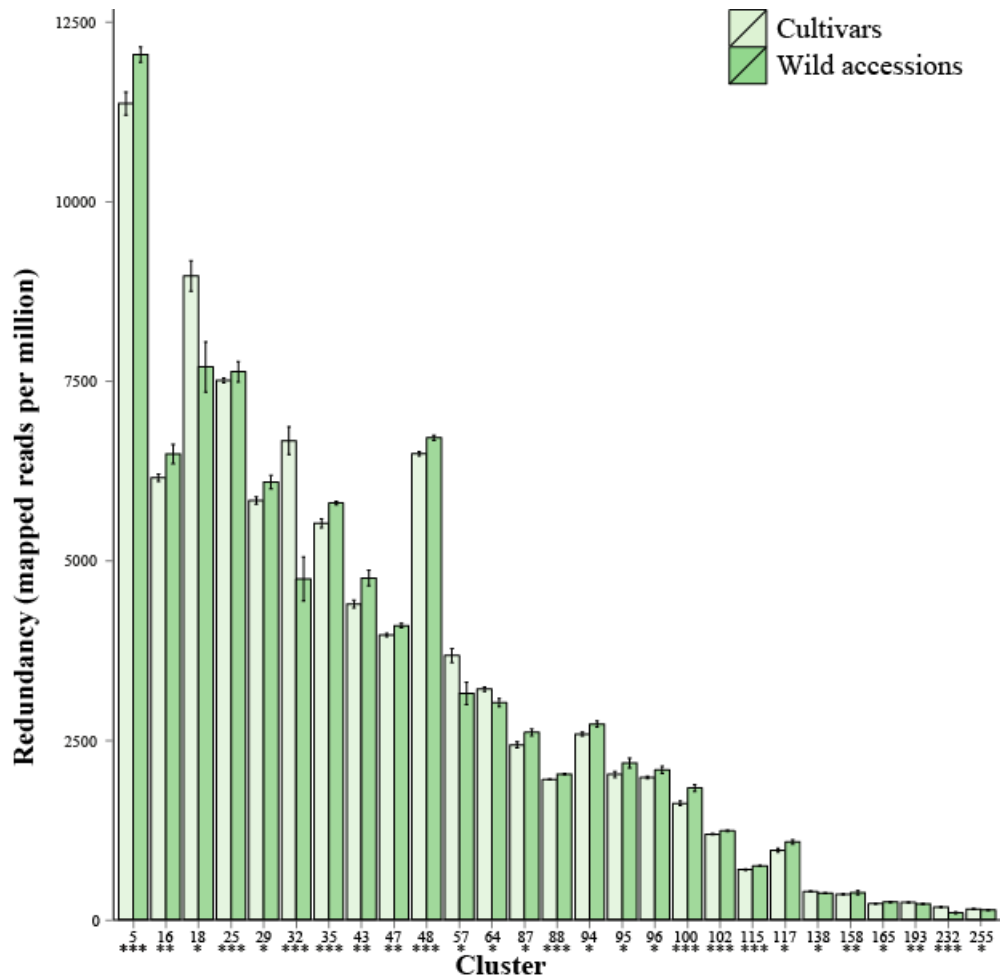

Mean ( $\pm$  standard error, SE) redundancy in cultivars and wild accessions of 27 clusters produced and annotated as LTR-RTs by RepeatExplorer, showing differences of redundancy ( $p < 0.05$ ) in cultivars compared to wild accessions. Asterisks mark permutational MANOVA significance with the following significance codes: 0.001 '\*\*\*' 0.01 '\*\*' 0.05 '\*'.
