# Supplementary material for: Repetitive DNA and Plant Domestication: Variation in Copy Number and Proximity to Genes of LTR-Retrotransposons among Wild and Cultivated Sunflower (Helianthus annuus) Genotypes
Source: PubMed Central journal article supplement — Genome Biol Evol. 2015 Nov 24;7(12):3368–82. doi: 10.1093/gbe/evv230 (PMC4700961; doi:10.1093/gbe/evv230), 2015-11-24
Supplement: supp_evv230_Mascagni_SupplMat_4.pdf [file supp_evv230_Mascagni_SupplMat_4.pdf]

### Supplementary material 4

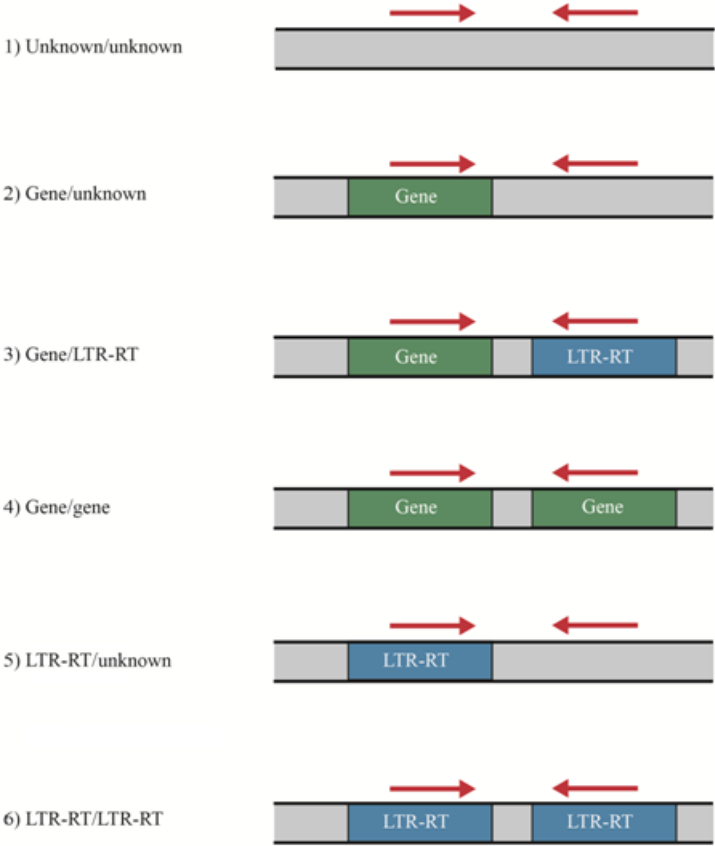

Possible mapping patterns for paired-end reads onto genes, retrotransposons, or unknown (*i.e.*, not annotated) sequences.
