# Supplementary material for: Repetitive DNA and Plant Domestication: Variation in Copy Number and Proximity to Genes of LTR-Retrotransposons among Wild and Cultivated Sunflower (Helianthus annuus) Genotypes
Source: PubMed Central journal article supplement — Genome Biol Evol. 2015 Nov 24;7(12):3368–82. doi: 10.1093/gbe/evv230 (PMC4700961; doi:10.1093/gbe/evv230), 2015-11-24
Supplement: supp_evv230_Mascagni_SupplMat_5.pdf [file supp_evv230_Mascagni_SupplMat_5.pdf]

## Supplementary material 5

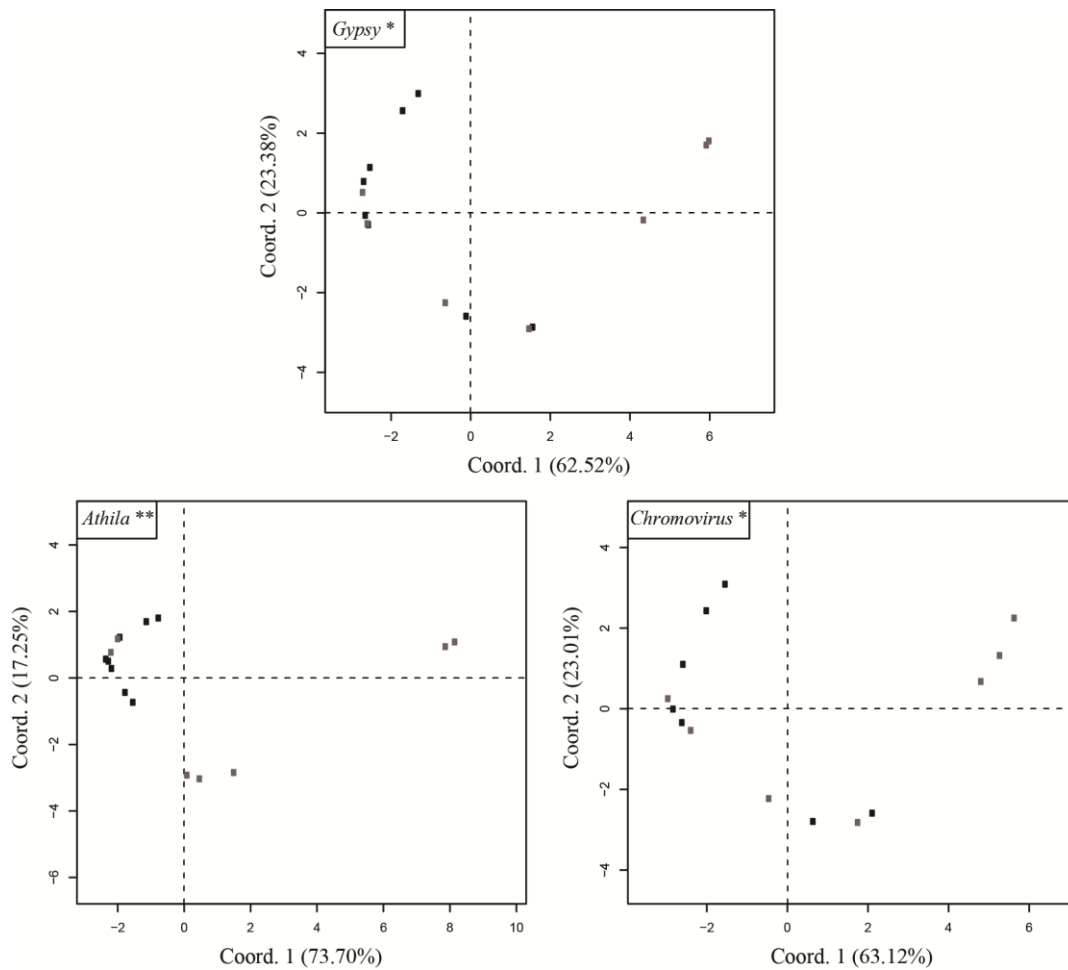

PCA plots of data on LTR-RTs proximity to genes of *Helianthus* genotypes for *Gypsy* superfamily, and for *Athila* and *Chromovirus* LTR-RT families in cultivars (dark dots) and wild accessions (light dots). The percentage of variation accounted by each axis is reported. Asterisks mark permutational MANOVA significance with the following significance codes: 0.01 ‘\*\*\*’ 0.05 ‘\*’.
